# Supplementary material
Source: PubMed Central journal article supplement (PMC6548719)
Supplement: NIHMS1031702-supplement-Supplemental.pdf [file NIHMS1031702-supplement-Supplemental.pdf]

## **Fine particle constituents and mortality: a time-series study in Beijing, China**

Chen Chen<sup>a</sup>, Dandan Xu<sup>a</sup>, Mike Z. He<sup>b</sup>, Yanwen Wang<sup>a</sup>, Zonghao Du<sup>a</sup>, Yanjun Du<sup>a</sup>, Yan Qian<sup>c</sup>, Dongsheng Ji<sup>d</sup>, Tiantian Li<sup>a,\*</sup>

<sup>a</sup> *Department of Environmental Health Risk Assessment, National Institute of Environmental Health, Chinese Center for Disease Control and Prevention, Beijing, China*

<sup>b</sup> *Department of Environmental Health Sciences, Columbia University Mailman School of Public Health, New York 10032, United States*

<sup>c</sup> *State Key Laboratory of Environmental Criteria and Risk Assessment, Chinese Research Academy of Environmental Sciences, Beijing 100012, China*

<sup>d</sup> *State Key Laboratory of Atmospheric Boundary Layer and Atmospheric Chemistry, Institute of Atmospheric Physics, Chinese Academy of Sciences, Beijing 100029, China*

*\* corresponding author*

*Address correspondence to Tiantian Li, No. 7 Panjiayuan Nanli, Chaoyang District, Beijing, 100021 China. Telephone: 008613671359855, Email: [tiantianli@gmail.com](mailto:tiantianli@gmail.com)*

### **Supporting Information**

|                                                                                                                                                                                                   |   |
|---------------------------------------------------------------------------------------------------------------------------------------------------------------------------------------------------|---|
| Figure S1 Map of study areas and fixed-site monitors location.....                                                                                                                                | 2 |
| Table S1 Correlation coefficients between PM <sub>2.5</sub> and chemical constituents.....                                                                                                        | 3 |
| Table S2 Percent increase (95% confidence interval) in mortality for anper IQR increase of PM <sub>2.5</sub> components increase at lag 0 day in sensitivity analysis for degrees of freedom.. .. | 4 |
| Table S3 Summary model estimates of BDL sensitivity analysis.....                                                                                                                                 | 5 |
| Table S4 Summary model estimates of sensitivity analysis for extreme values of PM <sub>2.5</sub> constituents.....                                                                                | 6 |

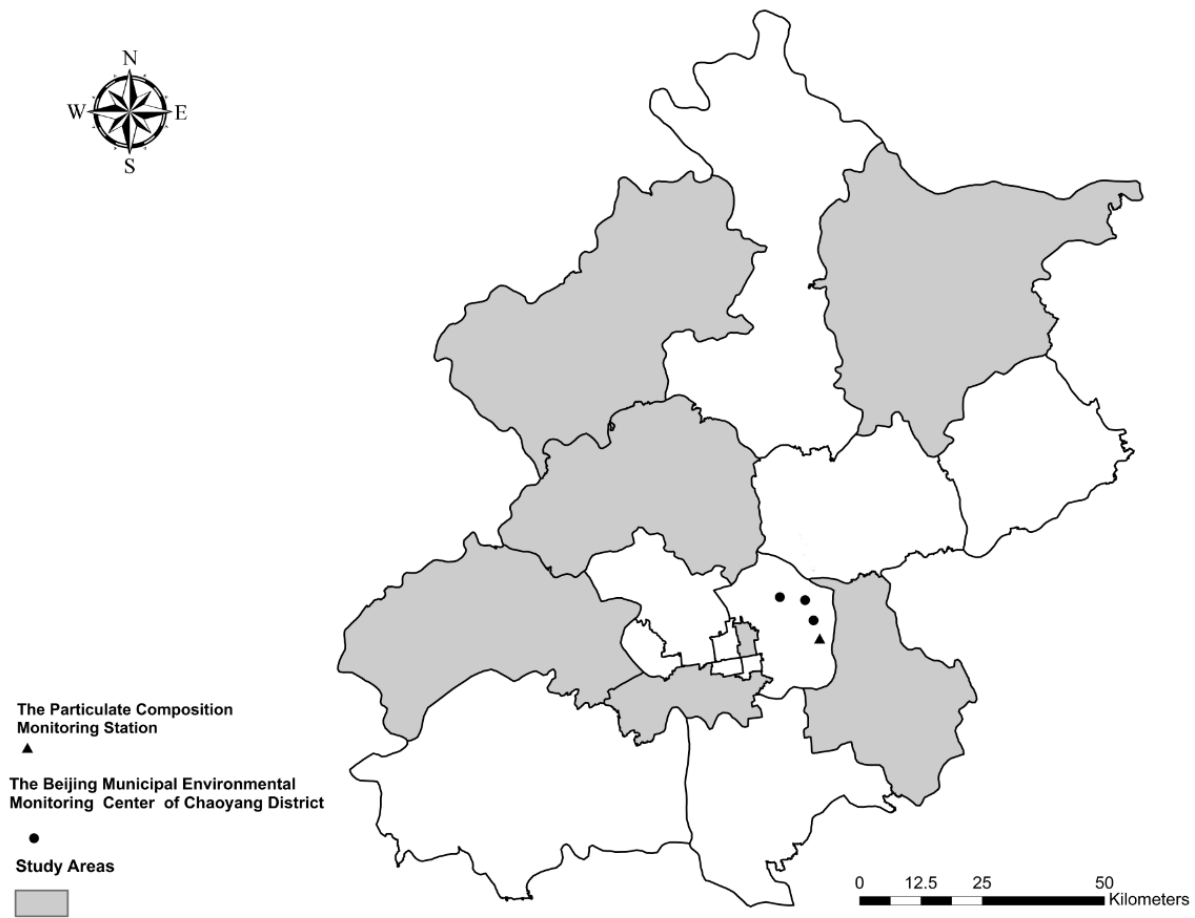

**Figure S1 Map of study areas and fixed-site monitors location**

**Table S1 Correlation coefficients between PM<sub>2.5</sub> and chemical constituents**

|                              | OC    | EC    | Na <sup>+</sup> | K <sup>+</sup> | NH <sub>4</sub> <sup>+</sup> | Ca <sup>2+</sup> | Mg <sup>2+</sup> | Cl <sup>-</sup> | NO <sub>3</sub> <sup>-</sup> | SO <sub>4</sub> <sup>2-</sup> |
|------------------------------|-------|-------|-----------------|----------------|------------------------------|------------------|------------------|-----------------|------------------------------|-------------------------------|
| PM <sub>2.5</sub>            | 0.78* | 0.79* | 0.05            | 0.13*          | 0.79*                        | 0.11*            | 0.14*            | 0.63*           | 0.80*                        | 0.80*                         |
| OC                           |       | 0.84* | 0.03            | 0.17*          | 0.62*                        | 0.20*            | 0.16*            | 0.75*           | 0.63*                        | 0.63*                         |
| EC                           |       |       | 0.01            | 0.16*          | 0.66*                        | 0.21*            | 0.12*            | 0.74*           | 0.67*                        | 0.59*                         |
| Na <sup>+</sup>              |       |       |                 | 0.04           | 0.01                         | 0.04             | 0.01             | 0.02            | 0.02                         | -0.01                         |
| K <sup>+</sup>               |       |       |                 |                | 0.12*                        | 0.17*            | 0.28*            | 0.22*           | 0.17*                        | 0.15*                         |
| NH <sub>4</sub> <sup>+</sup> |       |       |                 |                |                              | 0.04             | 0.12*            | 0.53*           | 0.82*                        | 0.65*                         |
| Ca <sup>2+</sup>             |       |       |                 |                |                              |                  | 0.13*            | 0.25*           | 0.09*                        | 0.03                          |
| Mg <sup>2+</sup>             |       |       |                 |                |                              |                  |                  | 0.31*           | 0.17*                        | 0.20*                         |
| Cl <sup>-</sup>              |       |       |                 |                |                              |                  |                  |                 | 0.58*                        | 0.54*                         |
| NO <sub>3</sub> <sup>-</sup> |       |       |                 |                |                              |                  |                  |                 |                              | 0.70*                         |

\*Pearson correlation test,  $p < 0.05$

**Table S2** Percent increase (95% confidence interval) in mortality per IQR increase of PM<sub>2.5</sub> components at lag 0 day in sensitivity analysis for degrees of freedom\*

| PM <sub>2.5</sub><br>Components | $df_{\text{meteorological factors}} = 3$ |                        | $df_{\text{meteorological factor}} = 5$ |                        |                        | Inclusion of PM <sub>2.5</sub> |
|---------------------------------|------------------------------------------|------------------------|-----------------------------------------|------------------------|------------------------|--------------------------------|
|                                 | $df_{\text{time}} = 6$                   | $df_{\text{time}} = 7$ | $df_{\text{time}} = 5$                  | $df_{\text{time}} = 6$ | $df_{\text{time}} = 7$ |                                |
| PM <sub>2.5</sub>               | 0.69 (-0.38, 1.77)                       | 0.64 (-0.42, 1.72)     | 0.66 (-0.42, 1.76)                      | 0.69 (-0.38, 1.78)     | 0.68 (-0.39, 1.76)     |                                |
| OC                              | 0.68 (-0.17, 1.54)                       | 0.64 (-0.21, 1.50)     | 0.61 (-0.25, 1.47)                      | 0.67 (-0.18, 1.53)     | 0.64 (-0.21, 1.50)     | 0.43 (-0.88, 1.75)             |
| EC                              | 0.78 (-0.17, 1.74)                       | 0.75 (-0.20, 1.71)     | 0.83 (-0.13, 1.80)                      | 0.79 (-0.17, 1.75)     | 0.77 (-0.19, 1.73)     | 0.85 (-0.60, 2.33)             |
| Na <sup>+</sup>                 | -0.11 (-0.21, 0.00)                      | -0.10 (-0.21, 0.00)    | -0.09 (-0.20, 0.02)                     | -0.11 (-0.22, -0.01)   | -0.11 (-0.21, 0.00)    | -0.09 (-0.20, 0.01)            |
| K <sup>+</sup>                  | 0.02 (-0.12, 0.15)                       | -0.02 (-0.16, 0.12)    | 0.06 (-0.08, 0.19)                      | 0.02 (-0.11, 0.16)     | -0.02 (-0.15, 0.12)    | 0.03 (-0.11, 0.17)             |
| NH <sub>4</sub> <sup>+</sup>    | 0.29 (-0.83, 1.43)                       | 0.14 (-0.97, 1.26)     | 0.41 (-0.72, 1.55)                      | 0.29 (-0.83, 1.43)     | 0.18 (-0.94, 1.31)     | -0.19 (-1.76, 1.40)            |
| Ca <sup>2+</sup>                | 0.23 (-0.24, 0.71)                       | 0.18 (-0.3, 0.66)      | 0.32 (-0.16, 0.79)                      | 0.24 (-0.24, 0.72)     | 0.17 (-0.31, 0.66)     | 0.25 (-0.23, 0.73)             |
| Mg <sup>2+</sup>                | 0.04 (-0.03, 0.11)                       | 0.03 (-0.05, 0.10)     | 0.05 (-0.02, 0.13)                      | 0.04 (-0.03, 0.11)     | 0.03 (-0.05, 0.10)     | 0.05 (-0.03, 0.12)             |
| Cl <sup>-</sup>                 | -0.17 (-1.00, 0.66)                      | -0.13 (-0.96, 0.70)    | -0.13 (-0.96, 0.71)                     | -0.18 (-1.01, 0.65)    | -0.16 (-0.98, 0.68)    | -0.75 (-1.78, 0.30)            |
| NO <sub>3</sub> <sup>-</sup>    | 0.44 (-0.38, 1.27)                       | 0.29 (-0.54, 1.12)     | 0.52 (-0.30, 1.35)                      | 0.45 (-0.38, 1.29)     | 0.32 (-0.51, 1.15)     | 0.28 (-0.81, 1.39)             |
| SO <sub>4</sub> <sup>2-</sup>   | 0.58 (-0.47, 1.65)                       | 0.62 (-0.44, 1.69)     | 0.63 (-0.45, 1.71)                      | 0.58 (-0.48, 1.65)     | 0.63 (-0.44, 1.70)     | 0.29 (-1.09, 1.69)             |

\* Sensitive analysis in changes for the degrees of freedom specified in the smooth functions and including the linearly-controlled PM<sub>2.5</sub> mass.

**Table S3 Summary model estimates of BDL sensitivity analysis\***

| <b>PM<sub>2.5</sub> Components</b> | Days of BDL | No. of daily data<br>(cases) | Mean of daily value<br>( $\mu\text{g}/\text{m}^3$ ) | SD<br>( $\mu\text{g}/\text{m}^3$ ) | IQR<br>( $\mu\text{g}/\text{m}^3$ ) | Model Estimate<br>(95% confidence interval) |
|------------------------------------|-------------|------------------------------|-----------------------------------------------------|------------------------------------|-------------------------------------|---------------------------------------------|
| OC                                 | 16          | 1078                         | 15.52                                               | 11.49                              | 10.11                               | 0.61(-0.24,1.48)                            |
| EC                                 | 43          | 1078                         | 2.28                                                | 1.95                               | 2.03                                | 0.85(-0.11,1.81)                            |
| Na <sup>+</sup>                    | 247         | 1079                         | 1.46                                                | 6.72                               | 0.91                                | -0.09(-0.20,0.01)                           |
| K <sup>+</sup>                     | 196         | 1049                         | 1.57                                                | 5.62                               | 1.01                                | 0.05(-0.08,0.18)                            |
| NH <sub>4</sub> <sup>+</sup>       | 24          | 1080                         | 11.97                                               | 11.65                              | 12.44                               | 0.44(-0.67,1.57)                            |
| Ca <sup>2+</sup>                   | 142         | 1080                         | 0.40                                                | 0.61                               | 0.38                                | 0.30(-0.17,0.78)                            |
| Mg <sup>2+</sup>                   | 434         | 1077                         | 0.13                                                | 0.44                               | 0.07                                | 0.07(-0.03,0.18)                            |
| Cl <sup>-</sup>                    | 84          | 1082                         | 2.34                                                | 3.28                               | 2.87                                | -0.14(-0.97,0.70)                           |
| NO <sub>3</sub> <sup>-</sup>       | 16          | 1082                         | 14.23                                               | 16.72                              | 14.50                               | 0.53(-0.28,1.35)                            |
| SO <sub>4</sub> <sup>2-</sup>      | 8           | 1083                         | 18.42                                               | 18.19                              | 20.10                               | 0.62(-0.45,1.69)                            |

\* BDL was replaced by half of the detection limit values. The PM<sub>2.5</sub> components exposure at lag 0 day was involved in this model estimation.

**Table S4 Summary model estimates of sensitivity analysis for extreme values of PM<sub>2.5</sub> constituents\***

| Pollutant                     | All-cause Mortality |                   | Cardiovascular Mortality |                   | Respiratory Mortality |                   |
|-------------------------------|---------------------|-------------------|--------------------------|-------------------|-----------------------|-------------------|
|                               | Full dataset        | < 99th percentile | Full dataset             | < 99th percentile | Full dataset          | < 99th percentile |
| PM <sub>2.5</sub>             | 0.01(-0.00,0.02)    | 0.01(-0.01,0.02)  | 0.01(-0.01,0.03)         | 0.00(-0.02,0.03)  | 0.02(-0.02,0.06)      | 0.03(-0.01,0.07)  |
| OC                            | 0.06(-0.03,0.14)    | 0.06(-0.04,0.15)  | 0.03(-0.09,0.15)         | 0.07(-0.06,0.20)  | 0.26(0.02,0.50)       | 0.34(0.07,0.61)   |
| EC                            | 0.42(-0.05,0.89)    | 0.40(-0.13,0.94)  | 0.33(-0.34,1.00)         | 0.52(-0.24,1.28)  | 0.68(-0.70,2.08)      | 0.69(-0.88,2.29)  |
| Na <sup>+</sup>               | -0.1(-0.22,0.02)    | 0.52(0.02,1.02)   | -0.09(-0.25,0.08)        | 0.38(-0.34,1.11)  | -0.22(-0.57,0.13)     | 2.18(0.84,3.54)   |
| K <sup>+</sup>                | 0.05(-0.08,0.18)    | 0.32(-0.04,0.68)  | 0.06(-0.13,0.25)         | 0.50(-0.01,1.01)  | 0.50(0.17,0.84)       | 1.61(0.61,2.61)   |
| NH <sub>4</sub> <sup>+</sup>  | 0.04(-0.05,0.13)    | 0.06(-0.04,0.16)  | 0.07(-0.06,0.20)         | 0.13(-0.01,0.28)  | 0.11(-0.16,0.38)      | 0.25(-0.05,0.56)  |
| Ca <sup>2+</sup>              | 0.91(-0.36,2.19)    | 0.13(-1.71,2.01)  | 0.38(-1.43,2.23)         | -1.44(-4.05,1.24) | 5.62(1.92,9.45)       | 6.02(0.43,11.92)  |
| Mg <sup>2+</sup>              | 1.17(-0.39,2.76)    | 3.04(-1.99,8.32)  | 1.17(-1.07,3.46)         | 3.12(-3.95,10.71) | 5.59(1.60,9.74)       | 16.4(1.26,33.80)  |
| Cl <sup>-</sup>               | -0.05(-0.34,0.24)   | 0.15(-0.21,0.51)  | 0.02(-0.40,0.44)         | 0.30(-0.21,0.81)  | 0.59(-0.25,1.45)      | 1.01(-0.04,2.06)  |
| NO <sub>3</sub> <sup>-</sup>  | 0.04(-0.02,0.09)    | 0.03(-0.04,0.10)  | 0.06(-0.02,0.14)         | 0.08(-0.02,0.18)  | 0.11(-0.06,0.27)      | 0.11(-0.1,0.32)   |
| SO <sub>4</sub> <sup>2-</sup> | 0.03(-0.02,0.08)    | 0.03(-0.03,0.09)  | 0.08(0.00,0.15)          | 0.10(0.01,0.18)   | 0.13(-0.03,0.28)      | 0.15(-0.03,0.33)  |

\* Model estimates were presented as percentage increase (95% confidence interval) in mortality for per pollutant 1ug/m<sup>3</sup> increase at lag 0 day.

Extreme values were defined as the 99th percentile of the pollutant's daily concentration and above during three-year time series.
